# Supplementary material for: Comparison of the molecular and cellular phenotypes of common mouse syngeneic models with human tumors
Source: BMC Genomics. 2020 Jan 2;21:2. doi: 10.1186/s12864-019-6344-3 (PMC6941261; doi:10.1186/s12864-019-6344-3)
Supplement: Supplementary file 3 — Additional file 3: Table S2. Validation of 115 variant calls by Sanger sequencing. [file 12864_2019_6344_MOESM3_ESM.xls]

## Sheet: WES.mut
SampleName	Sanger.Seq	chromosome_name	start	stop	reference	variant	gene_name	transcript_name	cdschange	ensembl_gene_id
LLCsr	G/G	11	5088084	5088084	T	C	Ewsr1	ENSMUST00000102930	c.307A>G	ENSMUSG00000009079
LLCsr	G/T	11	69587267	69587267	G	T	Trp53	ENSMUST00000108658	c.94G>T	ENSMUSG00000059552
LLCsr	G/C	11	69590672	69590672	G	C	Trp53	ENSMUST00000108658	c.1001G>C	ENSMUSG00000059552
LLCsr	G/T	11	101774133	101774133	C	A	Etv4	ENSMUST00000017868	c.496G>T	ENSMUSG00000017724
LLCsr	G/C	13	52640702	52640702	G	C	Syk	ENSMUST00000055087	c.1471G>C	ENSMUSG00000021457
LLCsr	C/T	17	32198405	32198405	G	A	Brd4	ENSMUST00000003726	c.3845C>T	ENSMUSG00000024002
LLCsr	C/G	17	32201512	32201512	G	C	Brd4	ENSMUST00000003726	c.2671C>G	ENSMUSG00000024002
LLCsr	A/G	1	169984905	169984905	T	C	Ddr2	ENSMUST00000027985	c.2017A>G	ENSMUSG00000026674
LLCsr	T/G	2	31801379	31801379	T	G	Abl1	ENSMUST00000075759	c.2909T>G	ENSMUSG00000026842
LLCsr	G/A	2	153400007	153400007	G	A	Asxl1	ENSMUST00000109790	c.2479G>A	ENSMUSG00000042548
LLCsr	A/C	2	153400071	153400071	A	C	Asxl1	ENSMUST00000109790	c.2543A>C	ENSMUSG00000042548
LLCsr	G/C	2	153400883	153400883	G	C	Asxl1	ENSMUST00000109790	c.3355G>C	ENSMUSG00000042548
LLCsr	C/T	2	153401052	153401052	C	T	Asxl1	ENSMUST00000109790	c.3524C>T	ENSMUSG00000042548
LLCsr	A/G	2	153401378	153401378	A	G	Asxl1	ENSMUST00000109790	c.3850A>G	ENSMUSG00000042548
LLCsr	G/A	2	153401927	153401927	G	A	Asxl1	ENSMUST00000109790	c.4399G>A	ENSMUSG00000042548
LLCsr	C/T	2	174299053	174299053	C	T	Gnas	ENSMUST00000080493	c.1192C>T	ENSMUSG00000027523
LLCsr	A/T	3	103060272	103060272	A	T	Nras	ENSMUST00000029445	c.183A>T	ENSMUSG00000027852
LLCsr	A/G	6	17540629	17540629	A	G	Met	ENSMUST00000080469	c.2553A>G	ENSMUSG00000009376
LLCsr	G/T	6	145246772	145246772	C	A	Kras	ENSMUST00000111710	c.34G>T	ENSMUSG00000030265
LLCsr	G/A	7	68195061	68195061	G	A	Igf1r	ENSMUST00000005671	c.2581G>A	ENSMUSG00000005533
LLCsr	G/A	9	21635786	21635786	G	A	Smarca4	ENSMUST00000098948	c.606G>A	ENSMUSG00000032187
LLCsr	T/A	9	64191594	64191594	A	T	Map2k1	ENSMUST00000005066	c.754T>A	ENSMUSG00000004936
LLCsr	G/T	9	64193790	64193790	C	A	Map2k1	ENSMUST00000005066	c.605G>T	ENSMUSG00000004936
B16F10	G/A	16	22383589	22383589	C	T	Etv5	ENSMUST00000168774	c.1468G>A	ENSMUSG00000013089
B16F10	G/A	16	92605792	92605792	C	T	Runx1	ENSMUST00000023673	c.1261G>A	ENSMUSG00000022952
B16F10	A/C	15	51982626	51982626	T	G	Rad21	ENSMUST00000022927	c.47A>C	ENSMUSG00000022314
B16F10	G/C	17	72205807	72205807	C	G	Alk	ENSMUST00000086639	c.1156G>C	ENSMUSG00000055471
B16F10	T/C	1	132994547	132994547	A	G	Mdm4	ENSMUST00000067398	c.859T>C	ENSMUSG00000054387
B16F10	A/C	2	26477115	26477115	T	G	Notch1	ENSMUST00000028288	c.2039A>C	ENSMUSG00000026923
B16F10	C/T	18	34313167	34313167	C	T	Apc	ENSMUST00000079362	c.3115C>T	ENSMUSG00000005871
B16F10	C/C	19	32799998	32799998	A	C	Pten	ENSMUST00000013807	c.391A>C	ENSMUSG00000013663
B16F10	A/G	11	69588379	69588379	A	G	Trp53	ENSMUST00000108658	c.382A>G	ENSMUSG00000059552
B16F10	A/T	5	150542763	150542763	A	T	Brca2	ENSMUST00000044620	c.5991A>T	ENSMUSG00000041147
B16F10	T/A	7	130169799	130169799	A	T	Fgfr2	ENSMUST00000122054	c.2192T>A	ENSMUSG00000030849
B16F10	C/A	8	71680757	71680757	C	A	Jak3	ENSMUST00000051995	c.1093C>A	ENSMUSG00000031805
B16F10	C/T	5	75166577	75166577	C	T	Pdgfra	ENSMUST00000000476	c.434C>T	ENSMUSG00000029231
B16F10	A/G	2	174298373	174298373	A	G	Gnas	ENSMUST00000080493	c.512A>G	ENSMUSG00000027523
4T1	A/A	11	69587265	69587265	C	CA	Trp53	ENSMUST00000108658	c.93dupA	ENSMUSG00000059552
A20	G/G	10	127064881	127064881	A	G	Cdk4	ENSMUST00000006911	c.401A>G	ENSMUSG00000006728
A20	G/G	11	69589186	69589186	A	G	Trp53	ENSMUST00000108658	c.709A>G	ENSMUSG00000059552
A20	A/C	16	4108119	4108119	T	G	Crebbp	ENSMUST00000023165	c.3529A>C	ENSMUSG00000022521
A20	A/G	16	4117361	4117361	T	C	Crebbp	ENSMUST00000023165	c.2777A>G	ENSMUSG00000022521
A20	A/C	5	75648403	75648403	A	C	Kit	ENSMUST00000144270	c.2280A>C	ENSMUSG00000005672
CT26	C/T	10	4712577	4712577	C	T	Esr1	ENSMUST00000067086	c.194C>T	ENSMUSG00000019768
CT26	T/G	13	63511820	63511820	A	C	Ptch1	ENSMUST00000021921	c.4018T>G	ENSMUSG00000021466
CT26	G/A	16	63595663	63595663	C	T	Epha3	ENSMUST00000064405	c.1972G>A	ENSMUSG00000052504
CT26	C/G	17	34112597	34112597	G	C	Brd2	ENSMUST00000025193	c.2375C>G	ENSMUSG00000024335
CT26	T/G	17	34113210	34113210	A	C	Brd2	ENSMUST00000025193	c.2107T>G	ENSMUSG00000024335
CT26	A/C	18	61076648	61076648	A	C	Pdgfrb	ENSMUST00000115274	c.2165A>C	ENSMUSG00000024620
CT26	C/T	1	170004738	170004738	G	A	Ddr2	ENSMUST00000027985	c.482C>T	ENSMUSG00000026674
CT26	C/A	2	26480980	26480980	G	T	Notch1	ENSMUST00000028288	c.1093C>A	ENSMUSG00000026923
CT26	G/A	2	174345779	174345779	G	A	Gnas	ENSMUST00000080493	c.3187G>A	ENSMUSG00000027523
CT26	A/G	3	95659269	95659269	A	G	Mcl1	ENSMUST00000037947	c.413A>G	ENSMUSG00000038612
CT26	G/A	4	148472045	148472045	G	A	Mtor	ENSMUST00000103221	c.2911G>A	ENSMUSG00000028991
CT26	G/A	5	75163747	75163747	G	A	Pdgfra	ENSMUST00000000476	c.262G>A	ENSMUSG00000029231
CT26	G/A	5	150542969	150542969	G	A	Brca2	ENSMUST00000044620	c.6197G>A	ENSMUSG00000041147
CT26	A/A	6	145246771	145246771	C	T	Kras	ENSMUST00000111710	c.35G>A	ENSMUSG00000030265
CT26	A/A	6	145246784	145246784	C	T	Kras	ENSMUST00000111710	c.22G>A	ENSMUSG00000030265
CT26	C/T	8	25555736	25555736	C	T	Fgfr1	ENSMUST00000179592	c.359C>T	ENSMUSG00000031565
CT26	A/G	9	21655744	21655744	A	G	Smarca4	ENSMUST00000098948	c.2119A>G	ENSMUSG00000032187
CT26	T/G	9	95874112	95874112	T	G	Atr	ENSMUST00000034980	c.2376T>G	ENSMUSG00000032409
CT26	G/-	11	5070269	5070269	TC	T	Ewsr1	ENSMUST00000102930	c.1904delG	ENSMUSG00000009079
EL4	G/A	10	52066285	52066285	C	T	Ros1	ENSMUST00000020045	c.6341G>A	ENSMUSG00000019893
EL4	G/A	11	4799938	4799938	C	T	Nf2	ENSMUST00000109910	c.733G>A	ENSMUSG00000009073
EL4	A/G	11	16863018	16863018	A	G	Egfr	ENSMUST00000020329	c.497A>G	ENSMUSG00000020122
EL4	G/A	12	38865761	38865761	G	A	Etv1	ENSMUST00000095767	c.1426G>A	ENSMUSG00000004151
EL4	A/C	13	63523220	63523220	T	G	Ptch1	ENSMUST00000021921	c.2906A>C	ENSMUSG00000021466
EL4	T/T	19	32799995	32799995	C	T	Pten	ENSMUST00000013807	c.388C>T	ENSMUSG00000013663
EL4	C/T	2	27462507	27462507	G	A	Brd3	ENSMUST00000113941	c.410C>T	ENSMUSG00000026918
EL4	G/G	3	84903756	84903756	A	G	Fbxw7	ENSMUST00000107678	c.187A>G	ENSMUSG00000028086
EL4	C/T	3	133487011	133487011	G	A	Tet2	ENSMUST00000098603	c.1661C>T	ENSMUSG00000040943
EL4	T/C	5	147341331	147341331	A	G	Flt3	ENSMUST00000049324	c.2432T>C	ENSMUSG00000042817
EL4	C/T	6	17513425	17513425	C	T	Met	ENSMUST00000080469	c.1273C>T	ENSMUSG00000009376
EL4	C/T	6	118169136	118169136	G	A	Ret	ENSMUST00000032201	c.2381C>T	ENSMUSG00000030110
EL4	G/T	6	145246769	145246769	C	A	Kras	ENSMUST00000111710	c.37G>T	ENSMUSG00000030265
EL4	C/C	8	106656945	106656945	T	C	Cdh1	ENSMUST00000000312	c.815T>C	ENSMUSG00000000303
EMT6	A/T	16	63598246	63598246	T	A	Epha3	ENSMUST00000064405	c.1835A>T	ENSMUSG00000052504
EMT6	T/T	19	32811828	32811828	G	T	Pten	ENSMUST00000013807	c.625G>T	ENSMUSG00000013663
F9	C/T	11	4789749	4789749	G	A	Nf2	ENSMUST00000109910	c.1256C>T	ENSMUSG00000009073
F9	T/A	11	16871583	16871583	T	A	Egfr	ENSMUST00000020329	c.1007T>A	ENSMUSG00000020122
F9	G/A	7	68183427	68183427	G	A	Igf1r	ENSMUST00000005671	c.1334G>A	ENSMUSG00000005533
MC38	C/A	11	23296080	23296080	C	A	Xpo1	ENSMUST00000020538	c.3189C>A	ENSMUSG00000020290
MC38	G/T	11	33160831	33160831	C	A	Npm1	ENSMUST00000075641	c.349G>T	ENSMUSG00000057113
MC38	G/T	11	69589202	69589202	G	T	Trp53	ENSMUST00000108658	c.725G>T	ENSMUSG00000059552
MC38	G/T	11	69589250	69589250	G	T	Trp53	ENSMUST00000108658	c.773G>T	ENSMUSG00000059552
MC38	G/A	11	101770590	101770590	C	T	Etv4	ENSMUST00000017868	c.1237G>A	ENSMUSG00000017724
MC38	G/T	12	3904201	3904201	G	T	Dnmt3a	ENSMUST00000020991	c.2372G>T	ENSMUSG00000020661
MC38	C/A	12	56533684	56533684	G	T	Nkx2-1	ENSMUST00000001536	c.470C>A	ENSMUSG00000001496
MC38	A/G	16	17469314	17469314	A	G	Crkl	ENSMUST00000006293	c.733A>G	ENSMUSG00000006134
MC38	C/A	16	63585012	63585012	G	T	Epha3	ENSMUST00000064405	c.2084C>A	ENSMUSG00000052504
MC38	A/C	16	95409750	95409750	T	G	Erg	ENSMUST00000113846	c.242A>C	ENSMUSG00000040732
MC38	G/T	17	34113688	34113688	C	A	Brd2	ENSMUST00000025193	c.1717G>T	ENSMUSG00000024335
MC38	G/A	18	61076662	61076662	G	A	Pdgfrb	ENSMUST00000115274	c.2179G>A	ENSMUSG00000024620
MC38	G/C	18	73649811	73649811	C	G	Smad4	ENSMUST00000025393	c.1051G>C	ENSMUSG00000024515
MC38	G/C	18	76299953	76299953	G	C	Smad2	ENSMUST00000025453	c.955G>C	ENSMUSG00000024563
MC38	G/A	19	29271398	29271398	G	A	Jak2	ENSMUST00000025705	c.274G>A	ENSMUSG00000024789
MC38	C/A	1	68328259	68328259	G	T	Erbb4	ENSMUST00000119142	c.1298C>A	ENSMUSG00000062209
MC38	A/C	2	31689827	31689827	A	C	Abl1	ENSMUST00000075759	c.21A>C	ENSMUSG00000026842
MC38	G/T	2	153401208	153401208	G	T	Asxl1	ENSMUST00000109790	c.3680G>T	ENSMUSG00000042548
MC38	T/A	5	3390694	3390694	T	A	Cdk6	ENSMUST00000042410	c.247T>A	ENSMUSG00000040274
MC38	G/T	6	39643182	39643182	C	A	Braf	ENSMUST00000002487	c.1461G>T	ENSMUSG00000002413
MC38	C/G	8	71680683	71680683	C	G	Jak3	ENSMUST00000051995	c.1019C>G	ENSMUSG00000031805
MC38	G/T	9	21702957	21702957	G	T	Smarca4	ENSMUST00000098948	c.4843G>T	ENSMUSG00000032187
MC38	G/-	2	27459694	27459694	GC	G	Brd3	ENSMUST00000113941	c.845delG	ENSMUSG00000026918
MC38	G/-	3	98071034	98071034	TG	T	Notch2	ENSMUST00000079812	c.331delG	ENSMUSG00000027878
RENCA	C/T	11	69588703	69588703	C	T	Trp53	ENSMUST00000108658	c.628C>T	ENSMUSG00000059552
RENCA	A/C	11	101507953	101507953	T	G	Brca1	ENSMUST00000017290	c.4812A>C	ENSMUSG00000017146
RENCA	G/C	12	56533450	56533450	C	G	Nkx2-1	ENSMUST00000001536	c.704G>C	ENSMUSG00000001496
RENCA	C/G	16	4117488	4117488	G	C	Crebbp	ENSMUST00000023165	c.2650C>G	ENSMUSG00000022521
RENCA	G/A	16	63598241	63598241	C	T	Epha3	ENSMUST00000064405	c.1840G>A	ENSMUSG00000052504
RENCA	G/C	1	170005158	170005158	C	G	Ddr2	ENSMUST00000027985	c.332G>C	ENSMUSG00000026674
RENCA	C/T	3	133466886	133466886	G	A	Tet2	ENSMUST00000098603	c.5590C>T	ENSMUSG00000040943
RENCA	A/C	5	75964709	75964709	T	G	Kdr	ENSMUST00000113516	c.1127A>C	ENSMUSG00000062960
RENCA	C/A	6	118179286	118179286	G	T	Ret	ENSMUST00000032201	c.1052C>A	ENSMUSG00000030110
RENCA	G/A	9	53480734	53480734	C	T	Atm	ENSMUST00000118282	c.5354G>A	ENSMUSG00000034218
